# Supplementary material
Source: MDPI journal article supplement (https://www.mdpi.com/2071-1050/15/17/12995)
Supplement: s1 [file s1]

# Variables – PCA

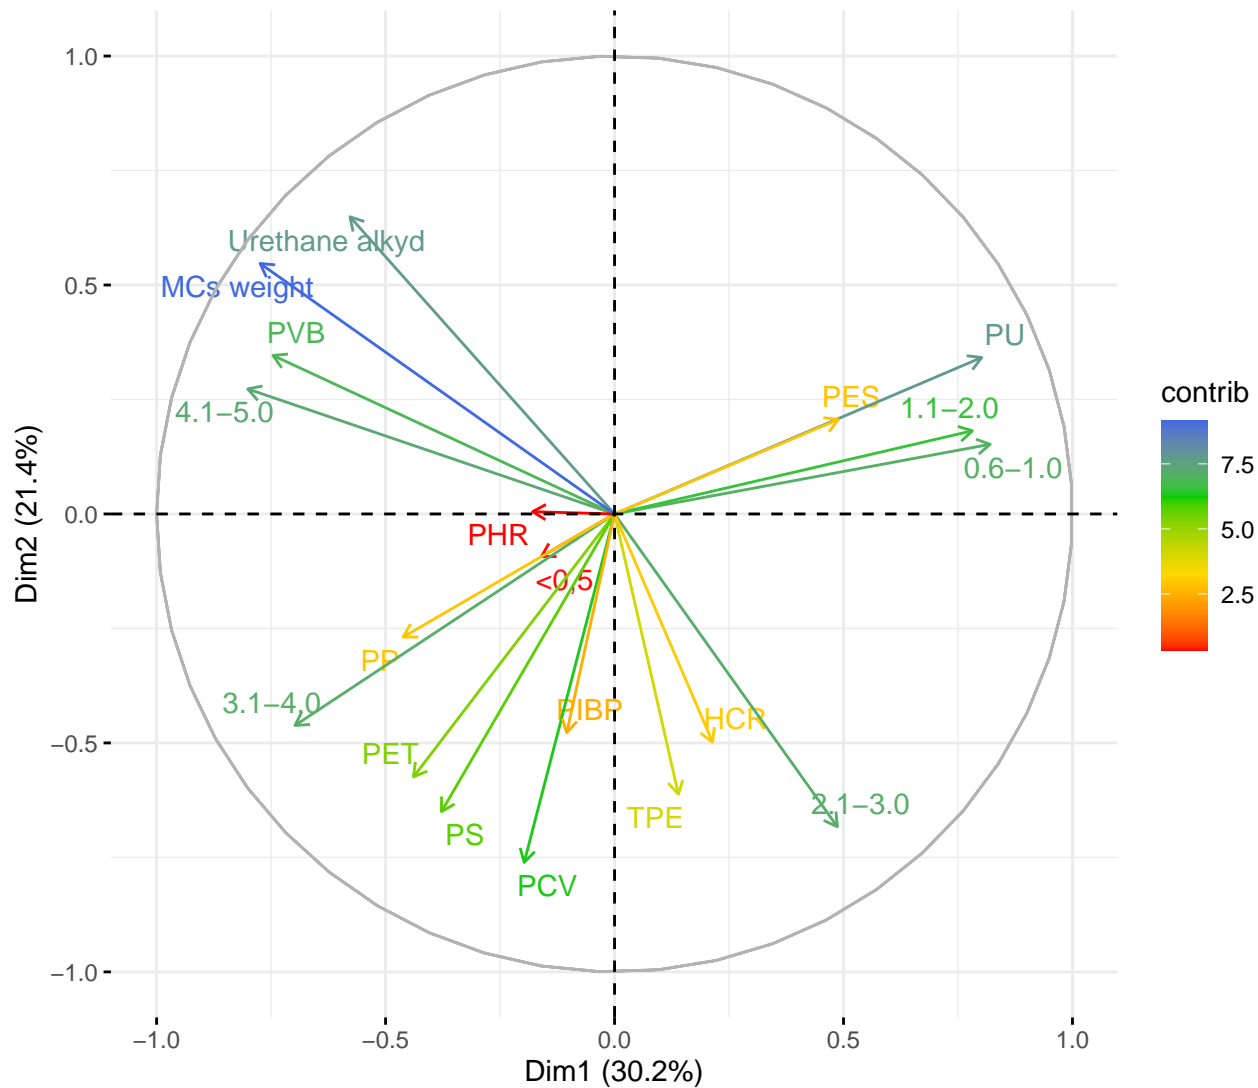

# Individuals – PCA

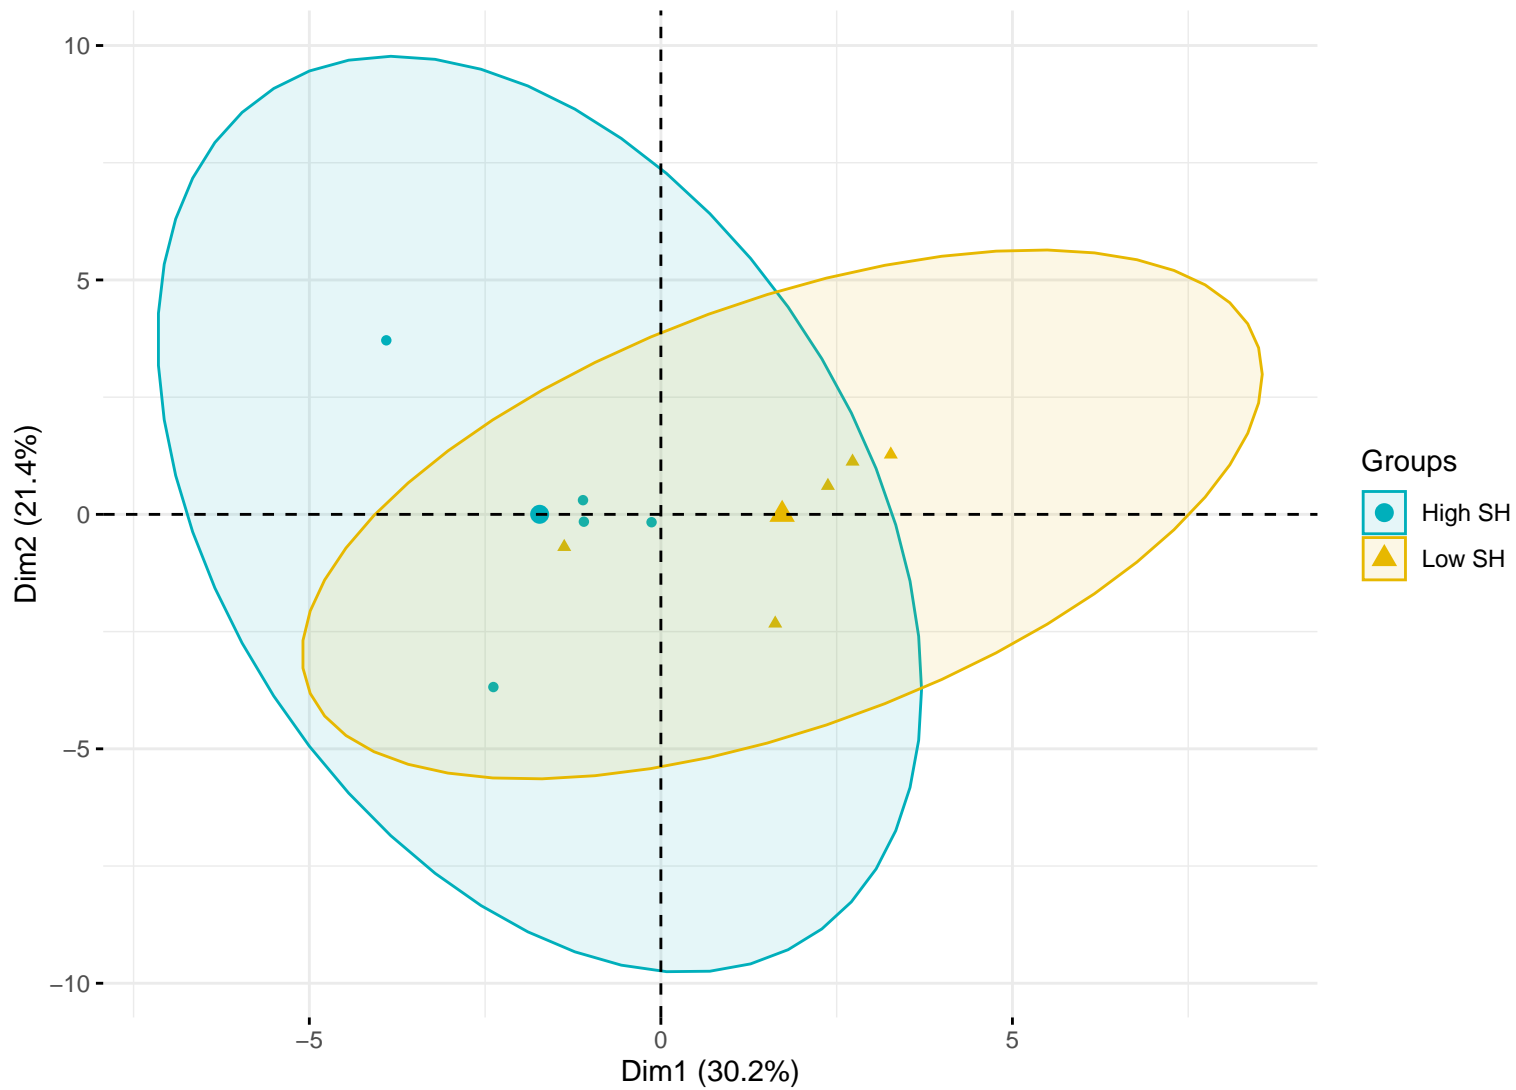

Figure S1. Projection of variables on the plane of the first and second PCA factors (Polyurethane (PU), Polyethylene terephthalate (PET), Polyester (PES), Polyvinyl butyral (PVB), Termoplastic elastomer (TPE), Polyvinyl chloride (PCV), Polypropylene (PP), Polystyrene (PS), Hydrocarbon resin (HCR), Phenoxo resin (PHR), Poly(isobutene isoprene) (PIBP); High SH – high sledding hill, Low SH – low sledding hill)
